# Supplementary material
Source: publisher figshare collection journal article supplement (https://sage.figshare.com/ndownloader/files/15603986)
Supplement: Supplementary file 1 [file 15603986]

Table 1 Supplement. Recent Constitutional Convention Referendum Votes

| <b>State</b>        | <b>Year</b> | <b>Yes</b> | <b>No</b>  | <b>Next Referendum</b> |
|---------------------|-------------|------------|------------|------------------------|
| Alaska              | 2012        | 33%        | 67%        | 2022                   |
| Connecticut         | 2008        | 41%        | 59%        | 2028                   |
| Hawaii              | 2008        | 34%        | 65%        | 2018                   |
| Illinois            | 2008        | 33%        | 67%        | 2028                   |
| Iowa                | 2010        | 33%        | 67%        | 2020                   |
| Maryland            | 2010        | 48%        | 40%        | 2030                   |
| Michigan            | 2010        | 33%        | 67%        | 2026                   |
| Missouri            | 2002        | 35%        | 65%        | 2022                   |
| Montana             | 2010        | 42%        | 58%        | 2030                   |
| New Hampshire       | 2012        | 36%        | 64%        | 2022                   |
| New York            | 2017        | 17%        | 83%        | 2037                   |
| Ohio                | 2012        | 32%        | 68%        | 2032                   |
| Rhode Island        | 2014        | 45%        | 55%        | 2024                   |
| <i>Average Vote</i> |             | <i>36%</i> | <i>63%</i> |                        |

Source: Ballotpedia 2018

Notes: Maryland requires a majority of all voters in the election, not just of those voting on the referendum in order to approve the convention. Oklahoma's constitution requires a referendum every 20 years, but the state ignored this provision since last holding a referendum in 1970.

Table 2 Supplement. Levels of Support for Various Issues

| <b>Issue</b>                | <b>Survey</b> | <b>Strongly support</b> | <b>Somewhat support</b> | <b>Somewhat oppose</b> | <b>Strongly oppose</b> | <b>Don't know/<br/>No opinion</b> |
|-----------------------------|---------------|-------------------------|-------------------------|------------------------|------------------------|-----------------------------------|
| Adirondack Development      | September     | 22                      | 21                      | 15                     | 34                     | 8                                 |
|                             | October       | 15                      | 22                      | 16                     | 39                     | 8                                 |
| Term Limits—Legislature     | September     | 60                      | 21                      | 8                      | 8                      | 3                                 |
|                             | October       | 61                      | 23                      | 8                      | 5                      | 2                                 |
| Term Limits—Statewide       | September     | 56                      | 25                      | 10                     | 7                      | 2                                 |
|                             | October       | 58                      | 21                      | 11                     | 8                      | 2                                 |
| Initiative                  | September     | 47                      | 31                      | 8                      | 6                      | 8                                 |
|                             | October       | 42                      | 32                      | 10                     | 7                      | 10                                |
| Close LLC Loophole          | September     | 58                      | 15                      | 11                     | 13                     | 3                                 |
|                             | October       | 61                      | 16                      | 7                      | 12                     | 4                                 |
| Full-time Legislature       | September     | 38                      | 28                      | 13                     | 12                     | 10                                |
|                             | October       | 39                      | 26                      | 14                     | 12                     | 9                                 |
| Limit Collective Bargaining | September     | 19                      | 22                      | 18                     | 35                     | 6                                 |
|                             | October       | 18                      | 18                      | 15                     | 42                     | 8                                 |
| Reproductive Rights         | September     | 61                      | 8                       | 7                      | 21                     | 2                                 |
| Anti-discrimination         | September     | 67                      | 15                      | 6                      | 9                      | 4                                 |
| Marijuana Legalization      | October       | 24                      | 22                      | 13                     | 37                     | 3                                 |

Note: Cell entries are weighted percentages of registered NY voters.

Figure 1 Supplement. Public Opinion toward CC17

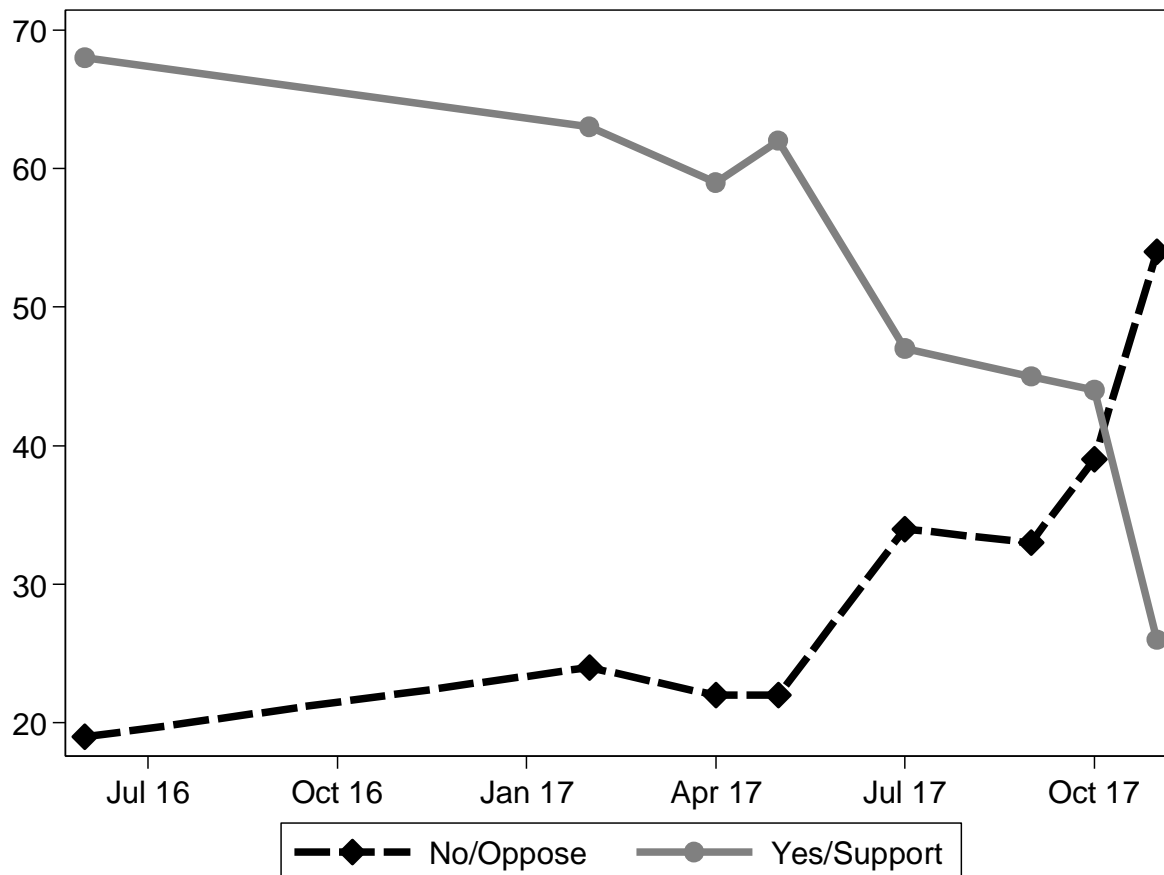

Notes: The figure plots responses to the question, “Specifically, the November ballot question on a Constitutional Convention will ask, “Shall there be a convention to revise the constitution and amend the same?” Will you vote “yes” to have a Constitutional Convention or “no” to not have a Constitutional Convention?” from July 2017 onward. Prior to then, the figures plots responses to the question, “Do you support or oppose having a New York State Constitutional Convention in which delegates propose changes to the State Constitution for voters to approve or reject?” All surveys sample registered voters in New York and were conducted by the Siena Research Institute.
